# Supplementary material
Source: publisher figshare collection journal article supplement (https://brill.figshare.com/ndownloader/files/30907933)
Supplement: Supplementary file 1 [file 30907933]

**Perceptual Organisation Affects Perception and Appreciation of  
Abstract Art: A Case Study with *Black Square and Red Square* by  
Kazimir Malevich**

**Arefe Sarami<sup>1,\*</sup>, Reza Afhami<sup>1,\*\*,\*\*\*</sup> and Johan Wagemans<sup>2,\*\*\*\*</sup>**

<sup>1</sup>Department of Art and Architecture, Tarbiat Modares University, Al Ahmad Street, 14115-111

Tehran, Iran

<sup>2</sup>Department of Brain & Cognition, University of Leuven (KU Leuven), Tiensestraat 102 - box  
3711, 3000 Leuven, Belgium

\* ORCID: 0000-0001-6332-5548

\*\* To whom correspondence should be addressed. E-mail: [afhami@modares.ac.ir](mailto:afhami@modares.ac.ir)

\*\*\* ORCID: 0000-0002-7678-6164

\*\*\*\* ORCID: 0000-0002-7970-1541

**Supplementary Material**

**Table S1.**

Original words for core variables or concepts in the language employed in the experiments (i.e., Persian) and their English equivalent.

| <b>Core variables or concepts</b> |                                    |               |
|-----------------------------------|------------------------------------|---------------|
| <b>English</b>                    | <b>Persian (employed language)</b> |               |
| <i>Exact square</i>               | Moraba'                            | مربع کامل     |
|                                   | Daghigh                            |               |
| <i>Oblique square</i>             | Chahâr-                            | چهارگوشه      |
|                                   | Guše                               |               |
| <i>Balanced</i>                   | Bâlâns                             | بالانس/ توازن |
| <i>Harmonious</i>                 | Hamâhangi                          | هماهنگی       |
| <i>Pleasing</i>                   | Lezzat-                            | لذت بخش       |
|                                   | baxš                               |               |
| <i>Interesting</i>                | Dust-                              | دوست داشتنی   |
|                                   | daštani                            |               |

## Appendix S1

### Art Experience Questionnaire of Experiment 2.

We made a questionnaire consisting of three parts.

Part A was intended to measure *art expertise* using a mixture of six common items derived from former studies (Locher et al., 1999b, 2001b; Leder et al., 2014; Chamberlain & Wagemans, 2015; Winston & Cupchik, 1992).

#### Part A. (on Art Expertise)

| Item rated from 1 (none) to 5 (very) |                                                                                                                                                                                                                                                                                                                                                                                                                                                                                                                     |
|--------------------------------------|---------------------------------------------------------------------------------------------------------------------------------------------------------------------------------------------------------------------------------------------------------------------------------------------------------------------------------------------------------------------------------------------------------------------------------------------------------------------------------------------------------------------|
| 1                                    | How many art history or other art-related classes have you taken at high school level or above?                                                                                                                                                                                                                                                                                                                                                                                                                     |
| 2                                    | How many art theory or aesthetics classes have you taken at high school level or above?                                                                                                                                                                                                                                                                                                                                                                                                                             |
| 3                                    | How often do you visit museums and/or galleries with practical purposes?                                                                                                                                                                                                                                                                                                                                                                                                                                            |
| 4                                    | In the average week how many hours do you spend making visual art?                                                                                                                                                                                                                                                                                                                                                                                                                                                  |
| 5                                    | How much information do you have about visual art's styles?                                                                                                                                                                                                                                                                                                                                                                                                                                                         |
| 6                                    | How much information do you have about visual art's well-known artists?                                                                                                                                                                                                                                                                                                                                                                                                                                             |
| 7                                    | Have you had training in visual arts? Please specify your expertise in art.<br>1 = <i>professional</i> (includes artists, curators, art historians)<br>2 = <i>studying</i> (includes children doing the homework, school project, university project and parents helping their children to do artwork)<br>3 = <i>teaching</i> (ranges from primary to university)<br>4 = <i>non-professional</i> (includes personal interest and hobby)<br>5 = <i>unfamiliar</i> (includes do not have any knowledge or experience) |

Note: In Part A, the reliability was  $\alpha = 0.86$ .

Part B aimed to measure *art knowledge*. This part consisted of 10 items of Smith and Smith (2006) to assess art fluency and because our experiments concerned a geometric abstract painting, we added five items where people were asked to identify the abstract artwork type (style) and artists.

**Part B.** (on Art Knowledge)

| <i>Item</i> |                          | Subjects rate each of the items on the below<br>5-point scale |                                                               |
|-------------|--------------------------|---------------------------------------------------------------|---------------------------------------------------------------|
| 1           | Marry Cassatt            | 1                                                             | I have never heard of this artist or term.                    |
| 2           | Munch                    | 2                                                             | I have heard of this but don't really know anything about it. |
| 3           | John Singer Sargent      | 3                                                             | I have a vague idea of what this is.                          |
| 4           | Alessandro Boticelli     | 4                                                             | I understand this artist or idea when it is discussed.        |
| 5           | Lorenzo Bernini          | 5                                                             | I can talk intelligently about this artist or idea in art     |
| 6           | Fauvism                  |                                                               |                                                               |
| 7           | Egyptian Funerary Stelae |                                                               |                                                               |
| 8           | Impressionism            |                                                               |                                                               |
| 9           | Chinese Scrolls          |                                                               |                                                               |
| 10          | Abstract Expressionism   |                                                               |                                                               |
| 11          | Kazimir Malevich         |                                                               |                                                               |
| 12          | Piet Mondrian            |                                                               |                                                               |
| 13          | Susan Sanavandi          |                                                               |                                                               |
| 14          | Suprematism              |                                                               |                                                               |
| 15          | Abstract Art             |                                                               |                                                               |

Note: In Part B, the reliability was  $\alpha = 0.96$ .

Part C aimed to measure *art interest*. It consisted of 11 items derived from the VAIK questionnaire (Specker et al., 2020). All parts were rated on a five-point scale.

**Part C.** (on Art Interest)

| Item rated from 1 (none) to 5 (very) |                                                                         |
|--------------------------------------|-------------------------------------------------------------------------|
| 1                                    | I enjoyed art classes in school.                                        |
| 2                                    | I like to talk about art with others.                                   |
| 3                                    | I have many friends/ acquaintances that are interested in art.          |
| 4                                    | I am interested in art.                                                 |
| 5                                    | I am always looking for new artistic impressions and experiences        |
| 6                                    | In everyday life I routinely see art objects that fascinate me          |
| 7                                    | I come from a family interested in art .                                |
| 8                                    | How often do you visit a museum and/or galleries?                       |
| 9                                    | How often do you read books, magazines or catalogues about art?         |
| 10                                   | How often do you look at images of artworks (catalogues, intent, etc.)? |
| 11                                   | How often do you visit talks about art or art history?                  |

Note: In part C, the reliability was  $\alpha = 0.81$ .

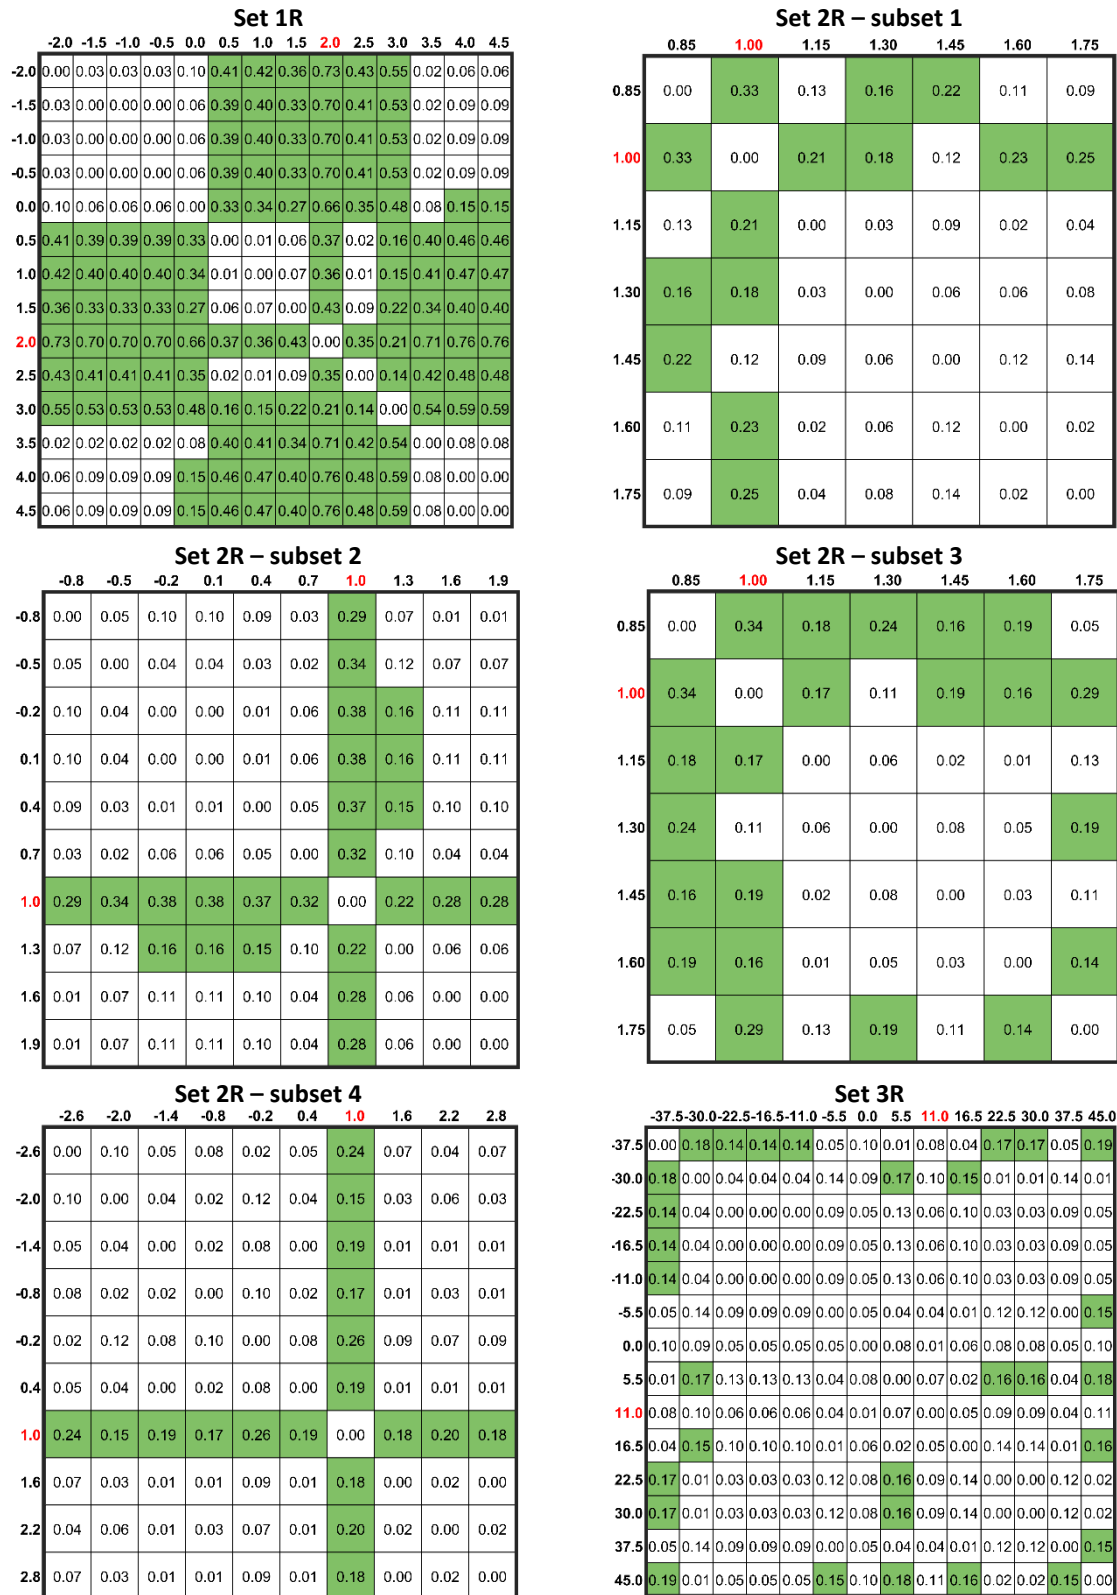

**Figure S1.** Pairwise comparison of percentage of Yes responses in Experiment 2. Each cell indicates a pairwise comparison between two different configurations. Phi-coefficient effect sizes

are reported, and cells are marked with a green shading in the cases where the difference was statistically significant ( $p < 0.05$ ).
